# Supplementary material for: Rejuvenating conventional dendritic cells and T follicular helper cell formation after vaccination
Source: eLife. 2020 Mar 24;9:e52473. doi: 10.7554/eLife.52473 (PMC7093110; doi:10.7554/eLife.52473)
Supplement: Figure 1—source data 1. [file elife-52473-fig1-data1.xlsx]

## Sheet: Sheet1
Source Data Figure 1
B: A.Tex12 IgG titre induced (Day 42-day 0)				D: Day 0: %CXCR5+PD-1+ (of CD4+CD45RA-)				E: Day 7: %CXCR5+PD-1+ (of CD4+CD45RA-)				F: Day 7: % CXCR5+PD-1+++ / Day 0: CXCR5+PD-1+++
18-36	65-78			18-36	65-78			18-36	65-78			18-36	65-78
457731	317674			0.25	0.11			0.31	0.75			1.24	6.82
776193	1079928			0.059	0.16			0.36	0.33			6.1	2.06
4561811	345532			0.16	0.2			1.16	0.42			7.25	2.1
920000	178214			0.14	0.42			0.22	0.42			1.57	1
3883291	180255			0.14	0.15			0.96	0.069			6.86	0.46
1397176	863664			0.067	0.062			0.53	0.42			7.91	6.77
5425659	17146			0.046	0.032			0.42	0.056			9.13	1.75
6291050	1833196			0.068	0.12			0.39	0.091			5.74	0.76
4994442	7273374			0.033	0.082			0.76	1.68			23.03	20.49
7700000	288960			0.057	0.11			0.57	0.33			10	3
1969946	80459			0.24	0.35			0.23	0.13			0.96	0.37
1359528	640000			0.055	0.31			0.6	0.48			10.91	1.55
980000	3026846			0.017	0.025			0.55	0.66			32.35	26.4
1398670	1881678			0.13	0.076			0.51	0.4			3.92	5.26
2263361	20000			0.24	0.38			0.49	0.48			2.04	1.26
3339748	69342			0.085	0.19			0.56	0.21			6.59	1.11
	69759				0.11				0.15				1.36
	170000				0.068				0.16				2.35
