# Supplementary material for: Rejuvenating conventional dendritic cells and T follicular helper cell formation after vaccination
Source: eLife. 2020 Mar 24;9:e52473. doi: 10.7554/eLife.52473 (PMC7093110; doi:10.7554/eLife.52473)
Supplement: Figure 2—source data 1. [file elife-52473-fig2-data1.xlsx]

## Sheet: Sheet1
Source Data Figure 2
B: # Ki67+Bcl6+B220+ (day 0)				C: # Ki67+Bcl6+B220+ (day 10)				E: NP20-specific IgG1			F: NP7-specific IgG1			G: Ratio NP7/NP20-specific IgG1
3mo	23mo			3mo	23mo			3mo	23mo		3mo	23mo		3mo	23mo
34	2			30851	1392			3735.95	298.006		1119.78	293.395		0.299732	0.984527
70	10			11270	287			4744.05	n.d.		4564.28	n.d.		0.962106	n.d.
156	7			7755	5357			1964.78	79.9363		1411.62	n.d.		0.718461	n.d.
140	1			15593	6788			1000.45	n.d.		551.521	n.d.		0.551271	n.d.
223	0			18251	464			3744.77	529.168		1200.34	396.461		0.320537	0.749216
382	3			20088	30			4158.84	n.d.		3144.8	n.d.		0.756172	n.d.
165	0			20012	204			2893.51	94.3874		2020.42	n.d.		0.69826	n.d.
43	213			25163	2695			5045.78	705.809		2606.57	107.693		0.516585	0.15258
	27
	6							n.d. ...not detectable / below detection limit
	8
	5
J: # CXCR5hiPD1hiCD4+Foxp3- (day 0)				K: # CXCR5hiPD1hiCD4+Foxp3- (day 10)
3mo	23mo			3mo	23mo
200	10			12064	1840
175	14			4562	1515
441	9			6994	5266
177	10			10596	3466
184	2			10584	1062
352	7			10972	574
105	14			14477	1094
55	129			8639	4838
	31
	18
	44
	12
L: # 1W1K-I-Ab+CXCR5hiPD-1hiCD4+Foxp3- (day 0)				M: I: # 1W1K-I-Ab+CXCR5hiPD-1hiCD4+Foxp3- (day 10)
3mo	23mo			3mo	23mo
2	0			1312	156
1	0			497	149
4	0			665	516
5	0			1833	289
0	0			940	156
2	0			1753	330
0	0			1711	62
1	1			602	467
	0
	1
	3
	0
