# Supplementary material for: Rejuvenating conventional dendritic cells and T follicular helper cell formation after vaccination
Source: eLife. 2020 Mar 24;9:e52473. doi: 10.7554/eLife.52473 (PMC7093110; doi:10.7554/eLife.52473)
Supplement: Figure 3—figure supplement 1—source data 1. [file elife-52473-fig3-figsupp1-data1.xlsx]

## Sheet: Sheet1
Source Data Figure 3 - figure supplement 1
A: NP20-specific IgG1			B: NP7-specific IgG1			C: Ratio NP7/NP20-specific IgG1
2-3mo	22-23mo		2-3mo	22-23mo		2-3mo	22-23mo
51079.9	332.988		51965.1	179.98		1.01733	0.5405
41122.7	1756.65		33472.5	1161.91		0.813966	0.661434
33393.2	7100.32		31431.6	7134.38		0.941257	1.0048
54636	3164.36		51079.9	2261.3		0.934912	0.714615
55961.7	348.541		52398.4	206.402		0.936325	0.592189
43213.3	6759.22		28947.5	3152.03		0.669875	0.466331
	21691.3			16571.8			0.763981
	7112.62			3926.19			0.552003
E: # GFP+ of DC subsets						F: # GFP+ of DC subsets						G: MFI IAb of CD11b+cDC2s
CD103- cDC1	CD103+ cDC1	CD11b- cDC2	CD11b+ cDC2	Langherans		CD103- cDC1	CD103+ cDC1	CD11b- cDC2	CD11b+ cDC2	Langherans		2-3mo	22-24mo
92	852	900	6048	2148		5	5	9	474	68		17784	16235
124	626	1568	12006	4246		17	0	22	986	48		17833	25342
148	590	1842	10130	2530		0	0	5	426	64		23687	23960
174	1314	1138	7576	2540		31	76	40	1361	72		20132	23928
132	984	1384	9094	2094		17	4	31	222	26		17489	20804
156	790	1312	9368	1926								17097	23749
90	658	1116	7340	2226								20890	20324
182	668	1418	7574	1764								17618
H: MFI Yae of CD11b+ cDC2s			J: % TCR7 cells ≥ 1 division			L: % TCR7 cells ≥ 1 division
H2+/+	H2+/-		H2+/+	H2+/-		0	10	50	100
16375	12340		81.5	70.3		48.2	59.5	32	11.4
13957	11533		44.2	89.7			47.6	17.2	13.1
25405	12067		39.5	86.1			54.4	17.9	10.1
16107	9699		79.5	80.3
17725	12553		51	61.2		60.5	63	39.4	30.4
14366	9580		72.6	78.6		76.9	66.5	24.7	17.1
16965	11381		84.4	81.9		69.8	68	35.9
23696	12778		71.9	82.7
				72.7
				83.6
