# Supplementary material for: Rejuvenating conventional dendritic cells and T follicular helper cell formation after vaccination
Source: eLife. 2020 Mar 24;9:e52473. doi: 10.7554/eLife.52473 (PMC7093110; doi:10.7554/eLife.52473)
Supplement: Figure 3—source data 1. [file elife-52473-fig3-data1.xlsx]

## Sheet: Sheet1
Source Data Figure 3
B: % TCR7 cells ≥ 1 division			D: % OTII cells ≥ 1 division			F: % CXCR5+PD1+ of CD4+CD45.1+ (OTII; day 10)				G: # CD11b+cDC2 cells
3mo	23mo		3mo	23mo		3mo	23mo			3mo	23mo
43.4	5.13		94.9	70.9		23.9	1.48			48286	7164
81.5	6.38		91.7	70.4		16	1.74			21226	16778
73.9	15.6		93	72.4		5.14	4.33			51430	27653
82.5	28.2		94.7			17.4	7.64			34277	7831
87.8	10.9		89.7			18.2	10.8			63232	10917.1
91.7	40.9		86.2				0.52			111108	14325
							7.12			46850	12231
										54226	14432
											41375
											15523
H: # GFP+CD11b+cDC2 cells			J: MFI Yae of GFP+CD11b+ cDC2s			L: MFI CD86 of GFP+CD11b+ cDC2s			N: MFI CD80 of GFP+CD11b+ cDC2s				P: MFI CD40 of GFP+CD11b+ cDC2s
3mo	23mo		3mo	23mo		3mo	23mo		3mo	23mo			3mo	23mo
29462	4626		9367	4199		6024	2272		2260	1161			3243	2364
16299	6899		9151	6563		6965	4164		2777	1472			3874	3133
30477	7242		10322	6813		7562	3685		3415	1904			3946	3489
22697	4669		7015	4589		4421	3256		1855	1375			3466	3159
37440	4548.8		8638	7105		5209	4069		1930	1748			3435	3112
59923	9801		7189	7416		4497	4021		1437	1679			3502	3226
31898	6708		7224	5435		4057	2929		1427	1301			3240	2957
28756	6815		8644			4714			1885				3186
	10404
	7761
