# Supplementary material for: Rejuvenating conventional dendritic cells and T follicular helper cell formation after vaccination
Source: eLife. 2020 Mar 24;9:e52473. doi: 10.7554/eLife.52473 (PMC7093110; doi:10.7554/eLife.52473)
Supplement: Figure 4—source data 1. [file elife-52473-fig4-data1.xlsx]

## Sheet: Sheet1
Source Data Figure 4
C: RPKM values of "response to IFN-I" genes				D: Ifit1 mRNA levels			E: Mx1 mRNA levels			F: Ifnb1 mRNA levels
	3mo	23mo		3mo	23mo		3mo	23mo		3mo	23mo
Stat1	82.6431	54.5995		1.54	0.98		0.96	0.61		3.09	0.34
Aim2	3.95543	3.12493		1.83	0.27		1.22	0.69		0.75	0.47
Pyhin1	105.215	64.2147		1.8	0.3		1.42	0.71		0.96	0.91
Ifi204	15.3511	12.4746		0.25*	0.71		0.53	1.06		0.7	0.59
Ifi203	7.86941	6.38236		0.73	0.1*		0.82	0.81		0.64	0.33
Ifi202b	0.01616594*	0.01889402*		1.06	0.3		1.37	0.69
Ifi205	13.0767	9.49964								0.27	0
Gbp3	23.0973	12.576		0.97	0.36		1.07	0.73		0.87	0.52
Gbp2	195.614	95.8426		0.64	0.24		0.78	0.59		1.4	0.32
Ifnb1	0.03770652*	0.04406968*		0.63	0.34		0.78	0.53		8.55	0.27
Gbp6	1.42865	1.08734		2.56	0.34		1.54	1.03		1.75	0
Htra2	119.498	99.0967			0.17			1.27
Ndufa13	170.494	220.159			0.15			0.61
Trex1	174.202	123.566
Pnpt1	5.61076	3.68444		* excluded due to mismatch between technical replicates						0... below detection limit
Tgtp1	19.5204	9.27666
Irf1	88.3763	73.3866
Igtp	29.5614	17.7161
Ddx41	10.8524	8.37103
Irg1	0.25295405*	0.18469073*
Tmem173	76.9243	64.1976
Gm4951	0.87422184*	0.77151836*
Iigp1	1.77998	1.73015
Ifit3	64.9675	31.6425
Ifit1	66.0964	28.5989
* excluded due to low expression
H: %pSTAT1+(CD11c+CD11b+MHCII+CD172a+Lin-)					I: Ifit1 mRNA levels			J: Mx1 mRNA levels
	3mo	23mo			3mo	23mo		3mo	23mo
	33.1	31.9			21.82	25.76		14.99	11.67
	35.1	22.6			21.15	20.67		11.99	12.93
	31.6	32.1			22.33	15.66		11.01	17.84
	26.6	35.7			20.84	18.18		11.5	12.75
					19.85	27.18		12.02	17.35
	20.4	22.3
	19.4	22.3
	20.9	35.8
	18.9	14.2
	19.1	15.8
	16.6	27.2
		25.3
K: # GFP+CD11b+ cDC2s			L: MFI CD86 of GFP+CD11b+ cDC2s			M: MFI CD80 of GFP+CD11b+ cDC2s				N: Ifnb1 mRNA
3mo	23mo		3mo	23mo		3mo	23mo				Ifnb1 mRNA (norm. to Hprt)
12056	9246		34414	33037		1670	1910				unimmunised			immunised
14898	6143		43169	39669		1621	1529			Cell type	Expt 1	Expt 2	Expt 3	Expt 1	Expt 2	Expt 3
9568	12703		44119	29517		2292	833			CD3	0.47	0	0.24	0	0.21	0
7814			31338			1117				CD19	0	0	0	0.45	0	0.68
23478			40835			1771				Macrophages	0	0	0	10.46	35.71	12.17
7370			36990			1501				pDC	6.47	6.57	11.87	22.77	51.47	24.16
12835			41331			2021				cDC1	5.39	2.27	0	2.57	2.86	4.66
12634			61231			3286				cDC2+Lhs	0.37	1.25	0	0.58	5.63	1.87
19510	16232		37079	40540		2056	3151			0... below detection limit
36496	25231		40150	45199		2323	3201
5335	9942		28072	35251		1386	1811
7130	10143		33276	41431		1874	2128
24029			40054			2319
19440			40247			2391
O: # pDC			P: # CD4.1+ pDC			Q: # GFP+CD11b+ cDC2s			R: MFI CD86 of CD45.1+GFP+CD11b+ cDC2s				S: MFI CD80 of CD45.1+GFP+CD11b+ cDC2s
3mo	23mo		4mo	23mo		4mo	23mo		4mo	23mo			4mo	23mo
30348	1232		2143	3495		1529	461		34830	18676			2428	710
38046	1731		7375	2199		1081	1303		22770	14349			895	905
43330	2204		5629	521		2520	525		29097	19901			2060	1863
			3586			1925			32022				1957
9239	438		2778			352			22932				925
8310	2881
6321	2470		5115	4766		1965	725		23261	10699			1016	412
7976	7673		6065	2575		5307	1062		28072	11639			2405	684
	4911		6065			5391			31565				2568
	1760		4202			2521			21512				1315
			5068			2939			29447				1715
