# Supplementary material for: Rejuvenating conventional dendritic cells and T follicular helper cell formation after vaccination
Source: eLife. 2020 Mar 24;9:e52473. doi: 10.7554/eLife.52473 (PMC7093110; doi:10.7554/eLife.52473)
Supplement: Figure 5—source data 1. [file elife-52473-fig5-data1.xlsx]

## Sheet: Sheet1
Source Data Figure 5
A: Median fold change IFN-I gene signature from day 0						D-E: vaccine-specific IgG titre (log2FC (day 28-day 0))
1	2	3	4	5		23mo	IFN distance	A.Perth	B.Bris	A.Cali
0.229103	0.268203	0.148021	0.04508	0.01457			2.6223	2	0.5	1
0.055648	-0.06819	-0.01102	-0.06603	-0.08626			3.62981	0	0.5	5
0.683236	0.425336	-0.01898	-0.04999	0.036508			2.35636	0.5	1	2
0.121368	0.152154	0.106734	0.134144	0.076817			1.57634	2	1	6.5
0.195593	0.040295	0.072348	-0.05244	-0.00128			2.37638	2	2	3
							5.37769	3	0.5	3.5
							2.18621	5.5	6.5	7
							0.79063	0.5	0.5	1.5
							0.105693	0	-0.5	0
							1.20681	0.5	0.5	0.5
							1.74416	3.5	4	5.5
							0.346957	0	0	2
							2.41258	0.5	0	0
							9.51557	3	7.5	1.5
							1.1169	1.5	0	0.5
							1.81214	5.5	1	6.5
							3.4713	4	3	5.5
							1.35164	3.5	5.5	5
							0.90567	0	0.5	2
							12.7279	5	5	3
							4.81193	0.5	4.5	3
							1.20983	2.5	1	7.5
							1.26442	6.5	-3.5	7.5
							2.39973	3.5	0.5	3.5
							1.90636	4	2	2
							0.541506	1.5	0	3.5
							1.17217	2.5	1.5	2.5
							0.575563	2.5	1	8
							1.98384	5	0.5	3
							0.881831	0	1	1.5
							2.82737	8	3.5	7
							4.64254	5.5	4.5	3.5
							1.03989	0	1	0
							5.71519	3	7	5
							0.465545	0	4.5	0.5
							2.21833	4	3	1
							0.554523	1.5	1	2.5
							1.45975	3	0.5	4
							2.06405	0.5	0.5	2
						Young	7.13555	0.5	0	2
							1.07736	0	0	5
							5.85031	4.5	0.5	3.5
							8.68047	7	5	8
							6.75664	2	1	8.66667
							7.12289	5.5	5	5.33333
							10.585	3	5	8.5
							2.22243	2	0	5
							4.92127	5	7	7.5
							4.86498	2	-1	6
							6.20758	-0.5	1	2.5
							8.50663	4	5	7
							1.49026	4.5	5.5	8
							2.69536	0.5	1	1
							12.1038	5.5	2	7.5
							5.67524	3.5	0.5	2.5
							10.018	1	0	4
							3.6327	0.5	2.5	3.5
							2.91993	5.5	3.5	6
