# Supplementary material for: Rejuvenating conventional dendritic cells and T follicular helper cell formation after vaccination
Source: eLife. 2020 Mar 24;9:e52473. doi: 10.7554/eLife.52473 (PMC7093110; doi:10.7554/eLife.52473)
Supplement: Figure 6—figure supplement 1—source data 1. [file elife-52473-fig6-figsupp1-data1.xlsx]

## Sheet: Sheet1
Source Data Figure 6 - figure supplement 1
A: NP20-specific IgG1			B: NP7-specific IgG1			C: Ratio NP7/NP20-specific IgG1
Ifnar1fl/flItgax+/+	Ifnar1fl/flItgaxcre/+		Ifnar1fl/flItgax+/+	Ifnar1fl/flItgaxcre/+		Ifnar1fl/flItgax+/+	Ifnar1fl/flItgaxcre/+
9134.75	5941.45		2420.99	3225.63		0.265031	0.542902
440.387	4926.14		118.008	2646.46		0.267965	0.537227
13399.6	23798.3		2057.13	5432.02		0.153522	0.228253
15452.9	14085.2		3577.01	3459.05		0.231478	0.245581
18394.8	5902.55		5031.26	2110.8		0.273516	0.357609
19376	2609.8		6898.23	1185.31		0.35602	0.454178
3716.89	18391.7		578.376	3913.84		0.155607	0.212805
4755.79	12472		897.422	2799.77		0.188701	0.224484
