# Supplementary material for: Rejuvenating conventional dendritic cells and T follicular helper cell formation after vaccination
Source: eLife. 2020 Mar 24;9:e52473. doi: 10.7554/eLife.52473 (PMC7093110; doi:10.7554/eLife.52473)
Supplement: Figure 6—source data 1. [file elife-52473-fig6-data1.xlsx]

## Sheet: Sheet1
Source Data Figure 6
A: MFI CD80 of GFP+CD11b+ cDC2s			B: MFI CD86 of GFP+CD11b+ cDC2s			D: % OTII cells ≥ 1 division
Isotype Ctrl	anti-IFNAR1		Isotype Ctrl	anti-IFNAR1		IFNAR1+/+	IFNAR1-/-
4237	1917		70534	45972		88.6	72.5
5125	3339		78925	61530		90.4	75
3983	2210		65556	43378		95.2	72.2
4852	4099		70707	57336		88	65.3
8081	3656		99846	55148		94.4	82
6404	2119		86193	55958		92	89.3
6645	1405		88114	52532
F: # CXCR5highPD-1highCD4+Foxp3-			H: # 1W1K-I-Ab+CXCR5highPD-1highCD4+
Ifnar1fl/flItgax+/+	Ifnar1fl/flItgaxcre/+		Ifnar1fl/flItgax+/+	Ifnar1fl/flItgaxcre/+
13039	8036		449	297
11129	575		687	30
2703	1400		614	144
19361	7273		1687	171
12200	3736		540	62
12984	3800		317	190
6303	14549		205	535
	2214			234
	1496			27
