# Supplementary material for: Rejuvenating conventional dendritic cells and T follicular helper cell formation after vaccination
Source: eLife. 2020 Mar 24;9:e52473. doi: 10.7554/eLife.52473 (PMC7093110; doi:10.7554/eLife.52473)
Supplement: Figure 7—figure supplement 1—source data 1. [file elife-52473-fig7-figsupp1-data1.xlsx]

## Sheet: Sheet1
Source Data Figure 7 - figure supplement 1
A: Ifit1 mRNA levels			B: Mx1 mRNA levels			C: # CD11b+cDC2 cells
Untreated	Imiquimod		Untreated	Imiquimod		Untreated	Imiquimod
1.54	10.73		0.96	3.5		26302	90202
1.83	5.53		1.22	2.33		25817	118367
1.8	6.78		1.42	3		51208	66960
0.97	2.22		1.07	1.53		51048	154008
0.64	1.28		0.78	1.36		50326	86336
0.63	2.06		0.78	1.63		31303	104226
2.56	10.74		1.54	4.51		41925	95281
D: # GFP+CD11b+cDC2 cells			E: MFI CD86 of GFP+CD11b+ cDC2s			F: MFI CD80 of GFP+CD11b+ cDC2s
Untreated	Imiquimod		Untreated	Imiquimod		Untreated	Imiquimod
10116	40856		51521	100337		4528	6531
14947	48523		32331	80092		2782	4913
28887	29825		36812	88547		3138	5604
35842	77320		40933	82478		2578	4254
31148	46466		62894	83903		4074	4228
18361	51996		55148	88547		3325	4481
30125	69569		47673			3132
