# Supplementary material for: Rejuvenating conventional dendritic cells and T follicular helper cell formation after vaccination
Source: eLife. 2020 Mar 24;9:e52473. doi: 10.7554/eLife.52473 (PMC7093110; doi:10.7554/eLife.52473)
Supplement: Figure 7—source data 1. [file elife-52473-fig7-data1.xlsx]

## Sheet: Sheet1
Source Data Figure 7
B: Ifit1 mRNA levels			C: Mx1 mRNA levels			D: # CD11b+cDC2 cells
Untreated	Imiquimod		Untreated	Imiquimod		Untreated	Imiquimod
0.36	1.31		0.73	0.91		19230	22339
0.24	9.52		0.59	2.23		24756	75442
0.34	3.43		0.53	1.88		24583	89572
0.34	3.31		1.03	1.44		40616	108732
0.17	4.31		1.27	2.52		23280	69258
0.15	4.75		0.61	1.78		15660	67422
E: # GFP+CD11b+cDC2 cells			F: MFI CD86 of GFP+CD11b+ cDC2s			G: MFI CD80 of GFP+CD11b+ cDC2s
Untreated	Imiquimod		Untreated	Imiquimod		Untreated	Imiquimod
1993	16731		31189	94603		2319	5486
6656	16735		33436	67833		2240	4176
3098	16418		26196	87469		1881	4811
1387	28687		22824	98629		1615	5568
1073	3038		27021	74793		1642	4407
1253	9013		27021	76269		1725	5039
	16444			74246			5404
	14384			83086			5439
H: # GFP+CD11b+cDC2 cells					I: MFI CD86 of GFP+CD11b+ cDC2s					J: MFI CD80 of GFP+CD11b+ cDC2s
Ifnar1+/+	Ifnar1-/-	Ifnar1+/+ +imiquimod	Ifnar1-/- +imiquimod		Ifnar1+/+	Ifnar1-/-	Ifnar1+/+ +imiquimod	Ifnar1-/- +imiquimod		Ifnar1+/+	Ifnar1-/-	Ifnar1+/+ +imiquimod	Ifnar1-/- +imiquimod
24564	22259	59360	39708		49921	27410	61082	30088		2987	1709	3189	1856
24742	19686	95880	23020		34085	38723	77207	42036		1538	1874	4211	2107
60357	13310	52471	12133		46307	20042	71401	50900		2350	1459	4082	4142
16727		69577			41231		87683			2686		4944
18446		78540			36901		61530			2629		2963
15225		44125	19669		25580		81475	35937		2882		6349	2755
13928		27650	7950		48725		77207	35421		4801		6972	2951
19381		41447	13952		41732		88330	47214		3663		6660	3967
17958		74566	13248		59758		121817	61381		4537		9974	5964
		52785					112883					7033
		25564					64446					4299
