# Supplementary material for: Rejuvenating conventional dendritic cells and T follicular helper cell formation after vaccination
Source: eLife. 2020 Mar 24;9:e52473. doi: 10.7554/eLife.52473 (PMC7093110; doi:10.7554/eLife.52473)
Supplement: Figure 8—figure supplement 1—source data 1. [file elife-52473-fig8-figsupp1-data1.xlsx]

## Sheet: Sheet1
Source Data Figure 8 - figure supplement 1
A: NP20-specific IgG1			B: NP7-specific IgG1			C: Ratio NP7/NP20-specific IgG1
Untreated	Imiquimod		Untreated	Imiquimod		Untreated	Imiquimod
509.836	219.735		150	56.0814		0.294212	0.255223
214.665	61.6382		n.d.	28.0634		n.d.	0.455292
68.1518	255.212		n.d.	98.5716		n.d.	0.386235
1626.88	53.7259		447.459	n.d.		0.275042	n.d.
59.9461	641.881		n.d.	n.d.		n.d.	n.d.
229.953	n.d.		96.5357	n.d.		0.419807	n.d.
n.d.	60.5533		n.d.	n.d.		n.d.	n.d.
n.d.	44.6534		n.d.	n.d.		n.d.	n.d.
508.424	265.533		57.2905	70.637		0.112682	0.26602
176.45	79.2849		38.3172	22.7149		0.217156	0.286497
319.102	177.766		41.1356	50		0.128911	0.281268
641.904	128.747		264.246	n.d.		0.41166	n.d.
n.d. … not detectable / below detection limit
