# Supplementary material for: Rejuvenating conventional dendritic cells and T follicular helper cell formation after vaccination
Source: eLife. 2020 Mar 24;9:e52473. doi: 10.7554/eLife.52473 (PMC7093110; doi:10.7554/eLife.52473)
Supplement: Figure 8—source data 1. [file elife-52473-fig8-data1.xlsx]

## Sheet: Sheet1
Source Data Figure 8
B: # CXCR5hiPD1hiCD4+Foxp3- 23mo				C: # CXCR5hiPD1hiCD4+Foxp3- 2mo				G: # CXCR5hiPD1hiCD4+Foxp3-
Control	Imiquimod			Control	Imiquimod			Ifnar1fl/flItgax+/+	Ifnar1fl/flItgaxcre/+
188.1	4416.5			3444	4483.88			7821	4582
4293	1369.91			6496.64	3391.25			47990	14715
236.8	2509.88			8737.12	3394.8			24432	9251
1490.21	4128			1203.12	2613.7			18676	6683
	6660.5			6316.85	6256.07			16317	24904
				3692.45	11366			40280	11315
5280	2101.05							33690	4083
121.328	752.15			15805.8	11880			17651
567.295	283.116			10437.4	39366.5
532.837	5810			10307.4	19752
1798.6	3381.25			19511.6	17301.8
760.987	7253.12			22770	35159.2
386.337	5586			10100.9	44089.5
				16187.5	21679
408.425	185.385
3888.75	1735.06			2375.19	60319
672.5	4981.5			5580.71	28875
566.081	4047.75			1061.25	12822.2
672.96	1788.75			5492.3	20210
				6096.6	8711.62
				1771.88	1623.25
E: # 1W1K-IAb+CXCR5hiPD-1hiCD4+Foxp3- 23mo				F: # 1W1K-IAb+CXCR5hiPD-1hiCD4+Foxp3- 2mo				H: # 1W1K-IAb+CXCR5hiPD-1hiCD4+Foxp3-
Untreated	Imiquimod			Control	Imiquimod			Ifnar1fl/flItgax+/+	Ifnar1fl/flItgaxcre/+
0	205.568			368.508	570.675			847	659
24.327	56.1495			676.091	271.3			7598	1686
0	293.91			864.849	627.3			1086	769
123.475	161.508			170.844	186.06			2436	383
	96.1015			584.94	893.725			1122	2264
				469.948	1775.94			5936	2263
206.58	129.202							2637	416
31.7763	69.2285			517.871	1188			2022
12.7025	0			883.163	5676.1
36.6155	639.1			555.013	2962.8
53.958	676.25			1579.51	3686.03
25.8736	1044.45			1644.5	7697.02
57.2029	558.6			413.073	4757.02
				1618.75	3765.3
0	0
251.625	175.956			369.172	10448.1
75.589	996.3			369.806	5600
37.2422	116.517			90.2062	2036.47
91.5857	447.188			175.379	3132.55
				408.134	938.175
				34.8806	358.625
J: # Ki67+Bcl6+B220+ 23mo				K: # Ki67+Bcl6+B220+ 2mo
Control	Imiquimod			Control	Imiquimod
77.463	376.607			45633	3261
2544	862.538			64966.4	2611.26
236.8	5456.25			67111.2	1586.7
486.6	3096			14918.8	1949.2
	3330.25			30320.9	20428
				2685.42	42622.5
990	483
0	475.85			208264	8100
147.99	881.837			111600	151973
327.9	958.65			118931	84769
608.35	608.625			122644	48144
293.524	4351.88			106260	45612
28.6638	4998			32960.8	293543
				161875	86716
72.4625	61.795
11208.8	175.956			42074.8	227273
457.3	1618.99			16809.4	164500
158.9	2110.61			9020.62	105595
168.24	268.312			57419.5	106103
				45724.5	32836
				48600	12269
